# Supplementary material
Source: Springer Nature journal article supplement (https://www.springermedizin.de/resource/supplementary/12979_2007_43_MOESM1_ESM.pdf/9603250)

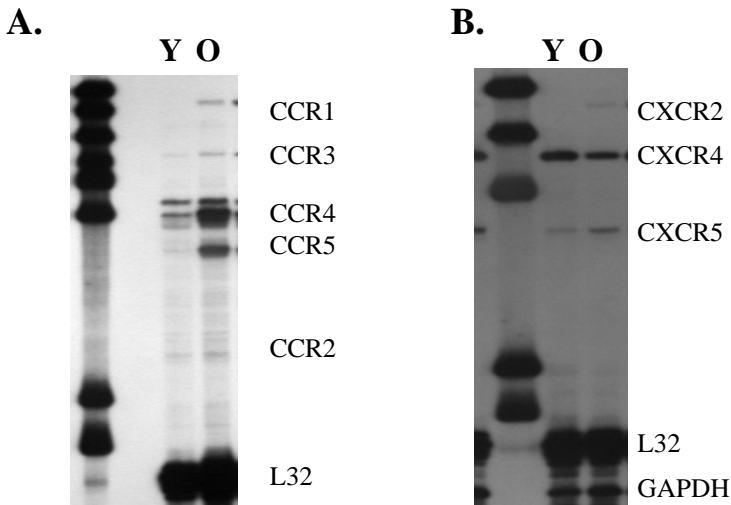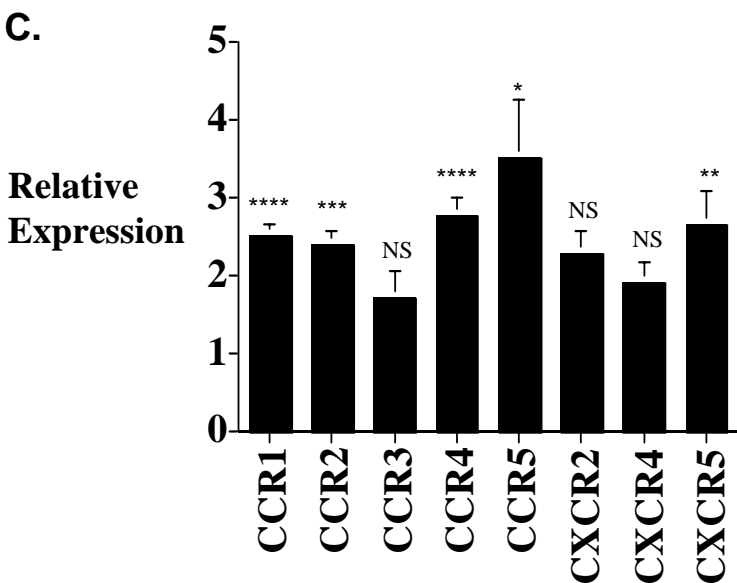

Supplement: MOESM1 [file 9603250]
